# Supplementary material for: Interactive responses of root and shoot of camphor tree (Cinnamomum camphora L.) to asymmetric disturbance treatments
Source: Frontiers journal article supplement (doi:10.3389/fpls.2022.993319), 2022-11-29
Supplement: Image_1.pdf [file Image_1.pdf]

## Appendix 1 Photos of experiment field

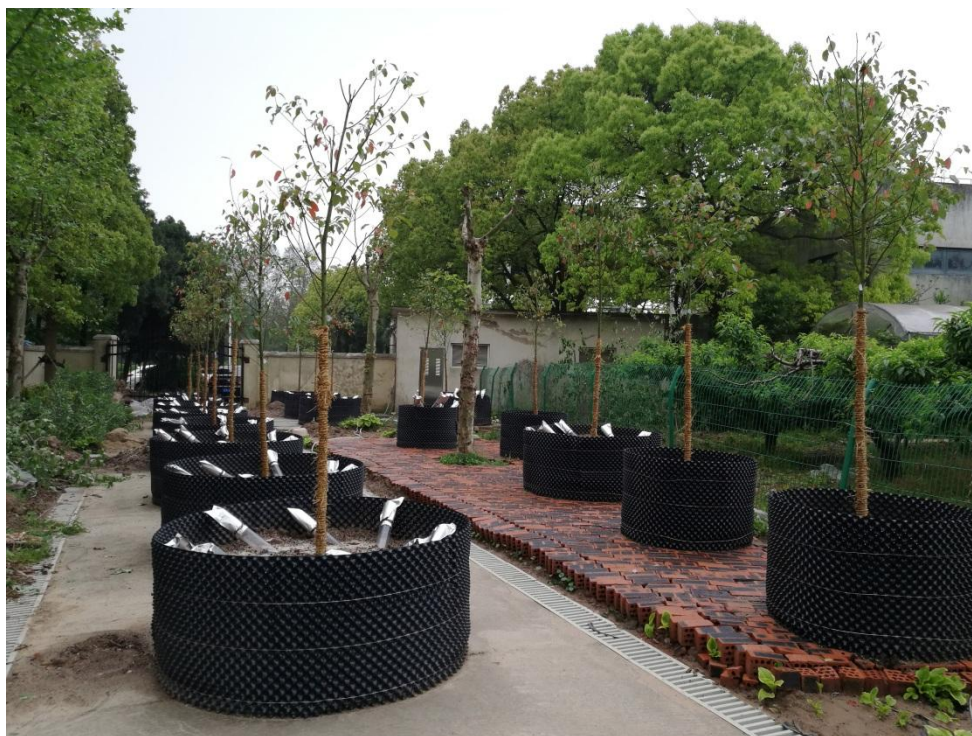

Photo 1: Experiment field, 04-2019

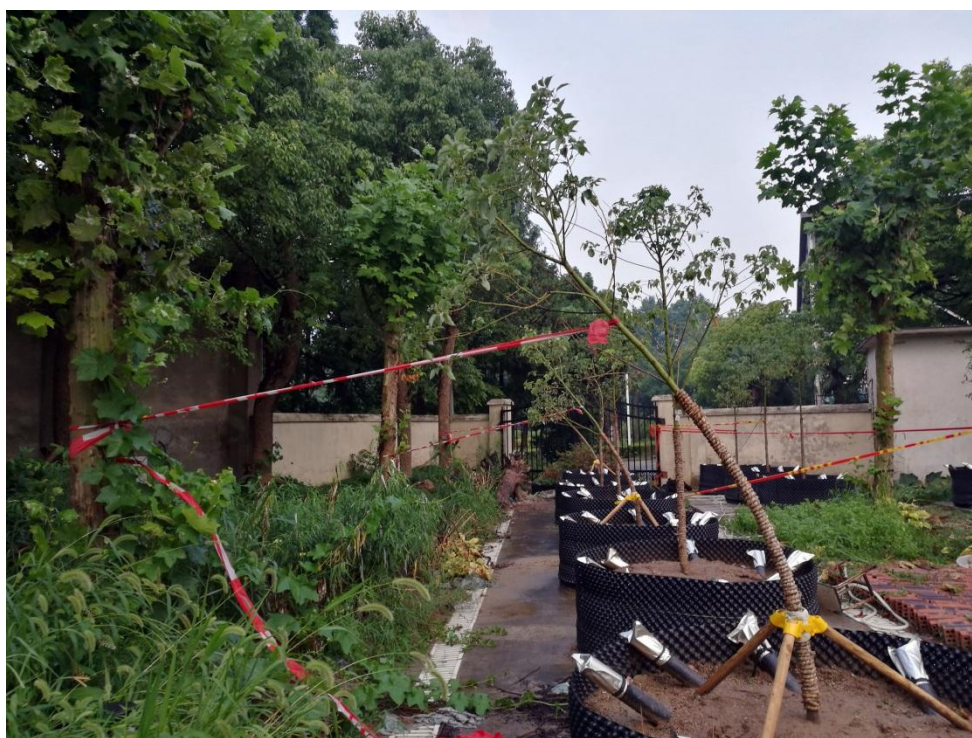

Photo 2: Inclined-trunk treatment, 07-2019

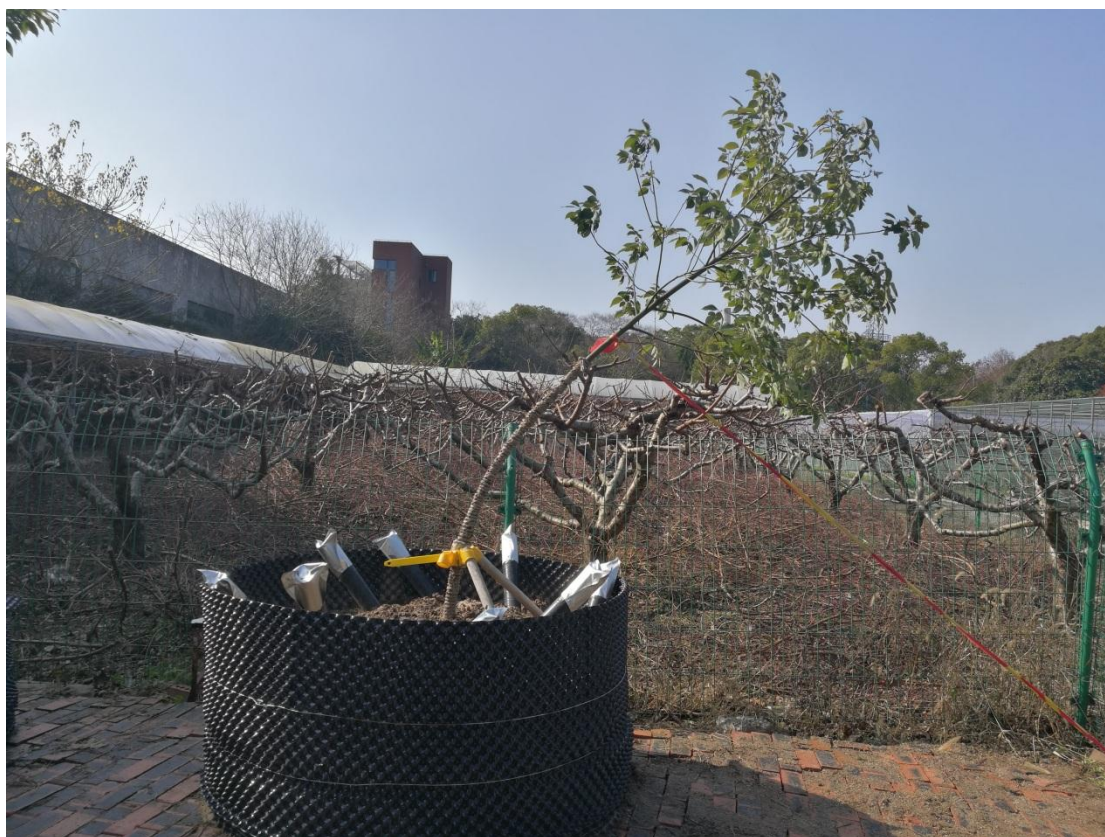

Photo 3: The tree added as an inclined-trunk treatment, 01-2020



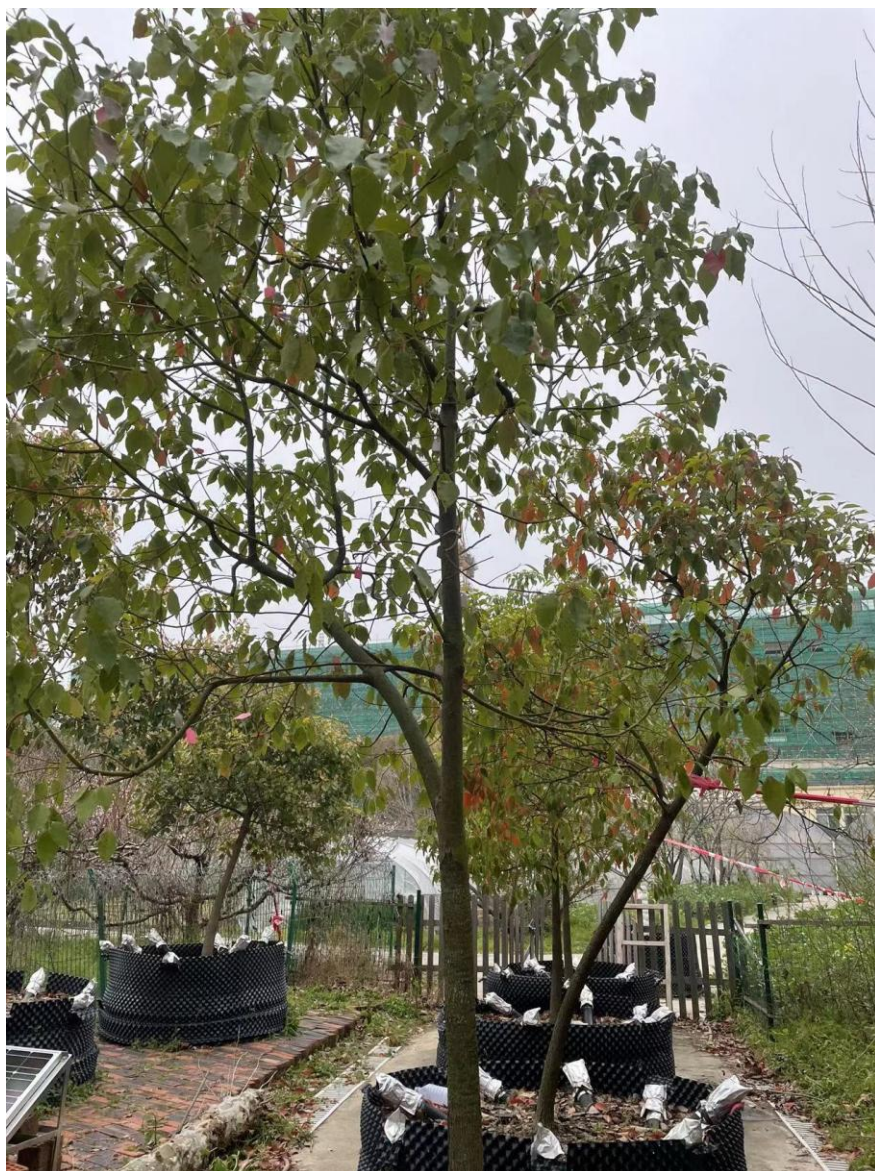

Photo 4: Half crown treatment



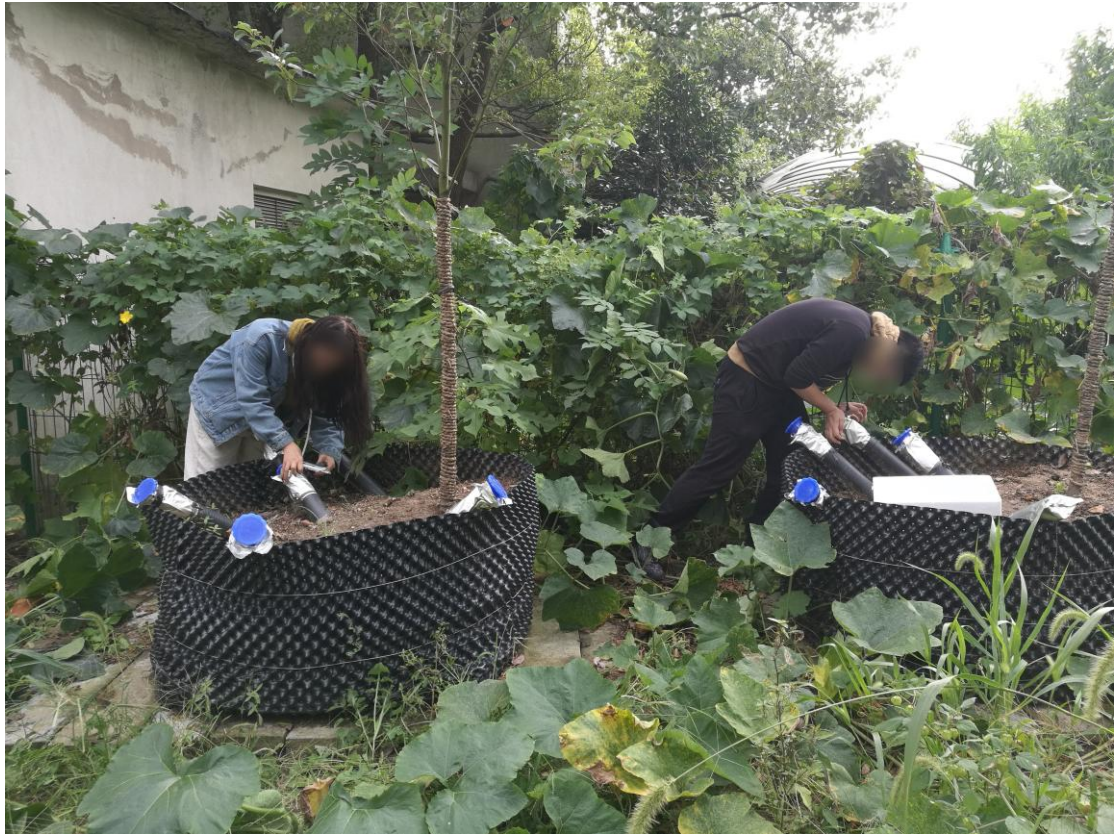

Photo 5: Biased root treatment

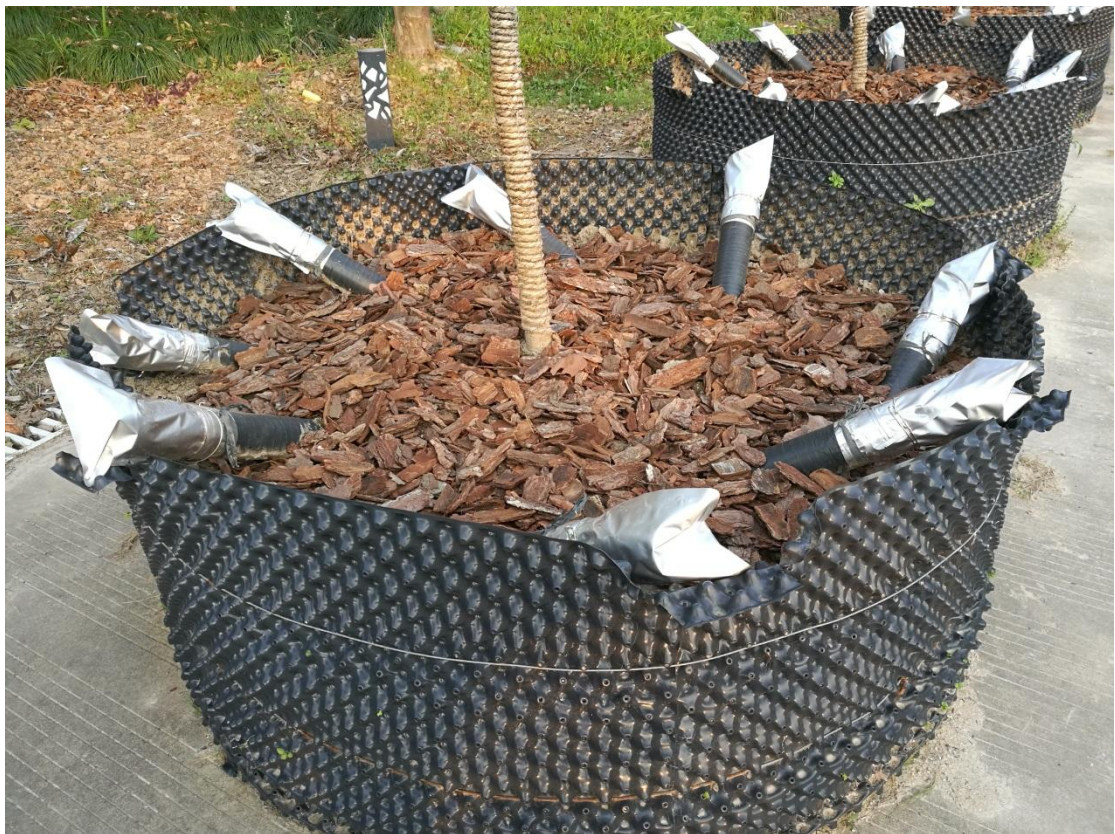

Photo 6: Layout of rhizotron tubes
